# Supplementary material for: DNA Methylation Impacts Gene Expression and Ensures Hypoxic Survival of Mycobacterium tuberculosis
Source: PubMed Central journal article supplement (PMC3701705; doi:10.1371/journal.ppat.1003419), 2013-07-04

Figure S2

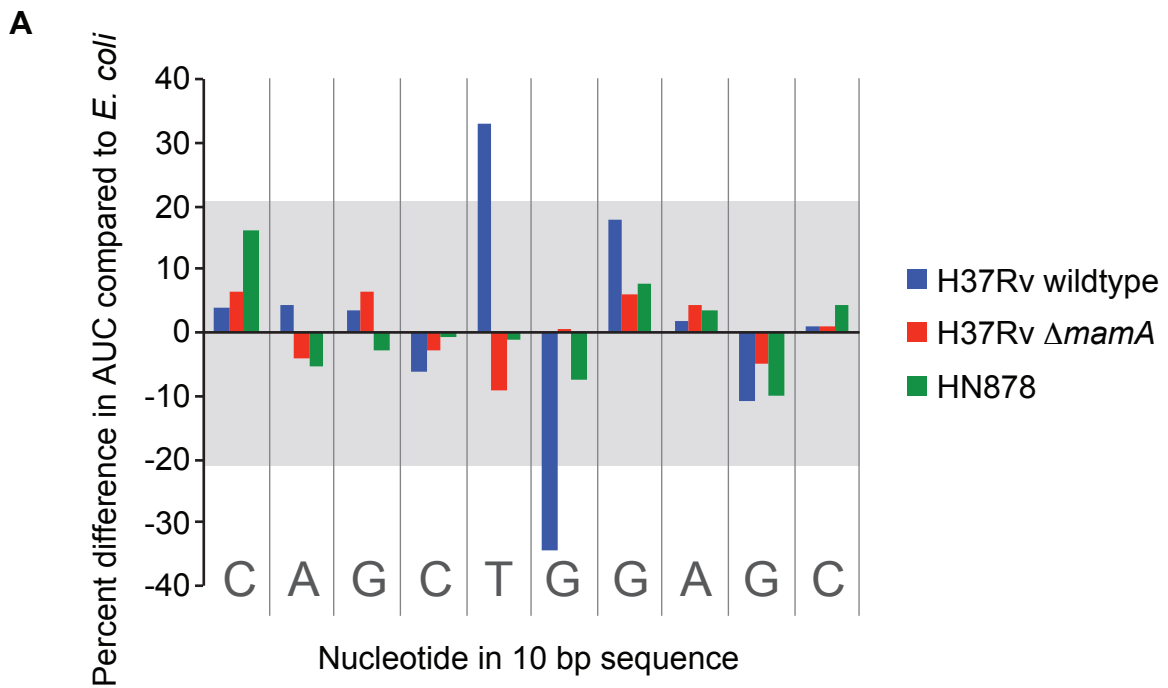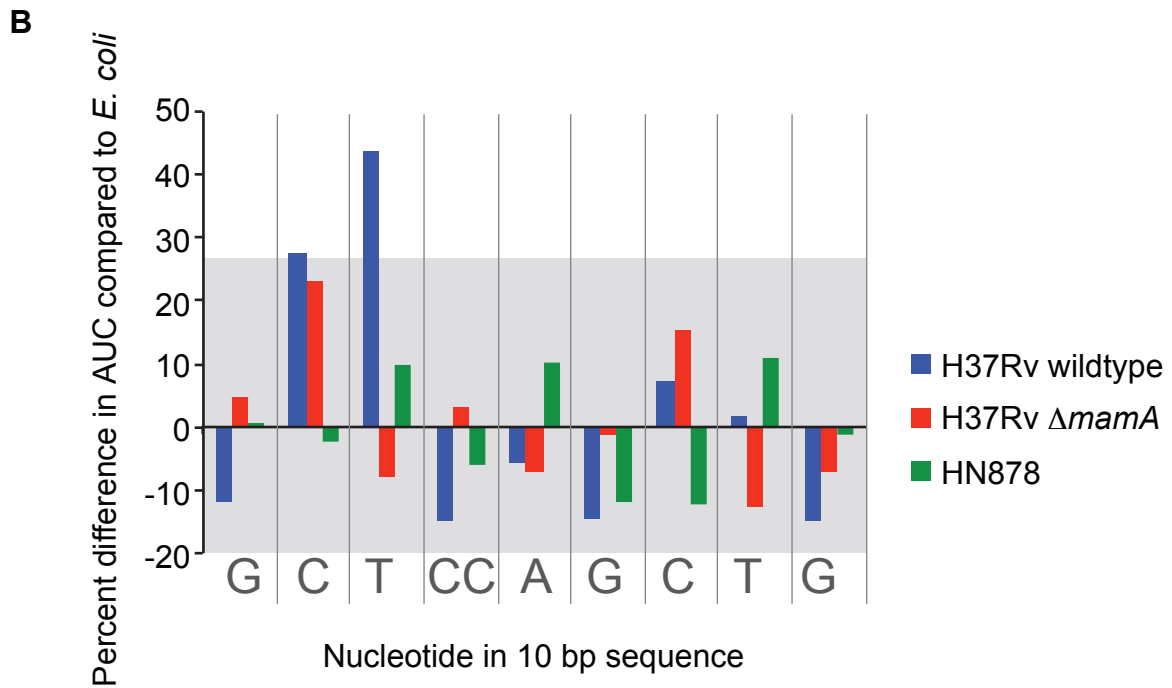

Supplement: ppat.1003419.s002.pdf [file ppat.1003419.s002.pdf]
