# Supplementary material for: DNA Methylation Impacts Gene Expression and Ensures Hypoxic Survival of Mycobacterium tuberculosis
Source: PLOS journal article supplement (doi:10.1371/journal.ppat.1003419), 2013-07-04

Figure S3

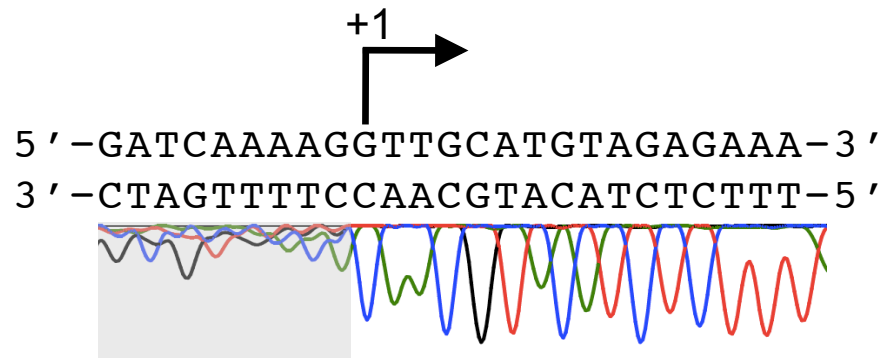

Supplement: S3 (10.1371/journal.ppat.1003419.s003) [file journal.ppat.1003419.s003]
