# Supplementary material for: DNA Methylation Impacts Gene Expression and Ensures Hypoxic Survival of Mycobacterium tuberculosis
Source: PLOS journal article supplement (doi:10.1371/journal.ppat.1003419), 2013-07-04
Supplement: S6 (10.1371/journal.ppat.1003419.s006) [file journal.ppat.1003419.s006]

# Figure S6

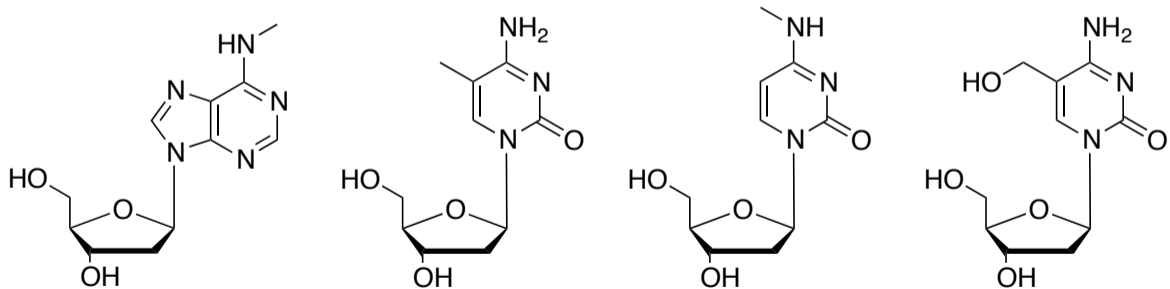

N<sup>6</sup>-Methyl dA

5-Methyl dC

N<sup>4</sup>-Methyl dC

5-HM dC
